# Supplementary material
Source: PubMed Central journal article supplement (PMC6165821)
Supplement: 2018_197640-Disclosures_adn_Contributions.pdf [file 2018_197640-Disclosures_adn_Contributions.pdf]

Haematologica  
HAEMATOL/2018/197640  
Version 3  
Daratumumab for relapsed/refractory Philadelphia-positive acute  
lymphoblastic leukemia

Chezi Ganzel, Mira Kharit, Chen Duksin, and Jacob M Rowe

Disclosures: none

Contributions: CG, MK and JMR wrote the manuscript; CD designed the study
